# Supplementary material
Source: publisher figshare collection journal article supplement (https://diabetesjournals.figshare.com/ndownloader/files/22774109)
Supplement: Supplementary file 1 [file 22774109]

Supplementary Table 1: The number of events and all-cause mortality rate (95% CI) / 1000 person years (PY) by age groups and BMI in those without ASCVD at baseline.

| **BMI** | **Age at Type 2 Diabetes** | **Number** | **Number of Events** | **Rate (95% CI) / 1000 PY** |
| --- | --- | --- | --- | --- |
| Normal | 18-39 | 1,661 | 40 | 3.9 (2.9, 5.4) |
| 40-49 | 2,552 | 151 | 9.1 (7.8, 10.7) |
| 50-59 | 4,211 | 407 | 14.0 (12.7, 15.4) |
| Overweight | 18-39 | 3,351 | 44 | 2.2 (1.6, 2.9) |
| 40-49 | 8,081 | 182 | 3.4 (2.9, 3.9) |
| 50-59 | 14,997 | 801 | 7.7 (7.2, 8.2) |
| Obese Grade 1 | 18-39 | 4,256 | 48 | 1.8 (1.4, 2.4) |
| 40-49 | 10,345 | 231 | 3.4 (3.0, 3.8) |
| 50-59 | 17,744 | 855 | 7.1 (6.6, 7.6) |
| Obese Grade 2+ | 18-39 | 7,965 | 129 | 2.6 (2.2, 3.0) |
| 40-49 | 14,813 | 441 | 4.6 (4.2, 5.1) |
| 50-59 | 18,781 | 1,013 | 8.4 (7.9, 9.0) |

Supplementary Table 2. The number of events and the rate (95% CI) / 1000 person years (PY) of ASCVD and all-cause mortality (ACM, for all patients and separately for those with and without ASCVD at diagnosis), by age groups and QRISK2 categories.

|  | **Age at Type 2 Diabetes Diagnosis (year)** | | | | |
| --- | --- | --- | --- | --- | --- |
|  | **18-39** | **40-49** | **50-59** | **60-69** | **70-79** |
| N (%) | 29,678 (8) | 56,798 (15) | 93,698 (25) | 107,261 (29) | 83,419 (23) |
| **ASCVD – Without History of ASCVD and High QRISK2** |  |  |  |  |  |
| N | - | 13,659 | 45,102 | 74,270 | 56,091 |
| Number of Events | - | 1,340 | 5,556 | 10,955 | 10,189 |
| Rate (95% CI) /1000 PY | - | 15.7 (14.8, 16.5) | 19.1 (18.6, 19.6) | 23.4 (23.0, 23.9) | 31.9 (31.3, 32.5) |
| **ASCVD – Without History of ASCVD and Low QRISK2** |  |  |  |  |  |
| N | - | 39,959 | 36,759 | 8,434 | 38 |
| Number of Events | - | 2,658 | 3,201 | 838 | 5 |
| Rate (95% CI) /1000 PY | - | 9.6 (9.2, 9.9) | 12.6 (12.2, 13.0) | 14.6 (13.7, 15.6) | 23.8 (9.9, 57.2) |
| **ACM – Without History of ASCVD and High QRISK2** |  |  |  |  |  |
| Number of Events | - | 551 | 3,352 | 10,072 | 15,023 |
| Rate (95% CI) /1000 PY | - | 6.0 (5.5, 6.5) | 10.5 (10.1, 10.8) | 19.2 (18.9, 19.6) | 41.0 (40.4, 41.7) |
| **ACM – Without History of ASCVD and Low QRISK2** |  |  |  |  |  |
| Number of Events | - | 1,177 | 1,885 | 712 | 6 |
| Rate (95% CI) /1000 PY | - | 4.0 (3.8, 4.3) | 6.9 (6.6, 7.3) | 11.6 (10.7, 12.4) | 27.4 (12.3, 60.9) |

ASCVD, atherosclerotic cardiovascular disease; ACM, all-cause mortality
